# Supplementary material for: An intelligent vancomycin release system for preventing surgical site infections of bone tissues
Source: Royal Society of Chemistry journal article supplement (doi:10.1039/d0bm00255k), 2020-01-01
Supplement: d0bm00255k1.pdf [file d0bm00255k1.pdf]

## An Intelligent vancomycin-release system for preventing surgical site infections (SSIs) of bone tissue

Yuan Li <sup>a, b, c, #</sup>, Guang Li <sup>d, #</sup>, Xiaoling Sha <sup>a, b, c, #</sup>, Litao Li <sup>c</sup>, Kuo Zhang <sup>b</sup>, Daohong Liu <sup>c</sup>, Yanfei Hao <sup>c</sup>, Xu Cui <sup>c, \*</sup>, Lei Wang <sup>b, \*</sup>, Hao Wang <sup>b, \*</sup>

<sup>a</sup> College of Medicine, Southwest Jiaotong University, No.111 Beiyiduan, Second Ring Road, Chengdu 610036, Sichuan Province, China

<sup>b</sup> CAS Center for Excellence in Nanoscience, CAS Key Laboratory for Biomedical Effects of Nanomaterials and Nanosafety, National Center for Nanoscience and Technology (NCNST), No. 11 Beiyitiao, Zhongguancun, Beijing 100000, China

<sup>c</sup> Department of Orthopaedics, The 8<sup>th</sup> Medical Center of Chinese PLA General Hospital, Jia No.17 Heishanhu road, Beijing 100000, China

<sup>d</sup> College of Medicine, Hebei North University, No.11 Diamond South Road, High-tech Zone, Zhangjiakou 075000, Hebei Province, China

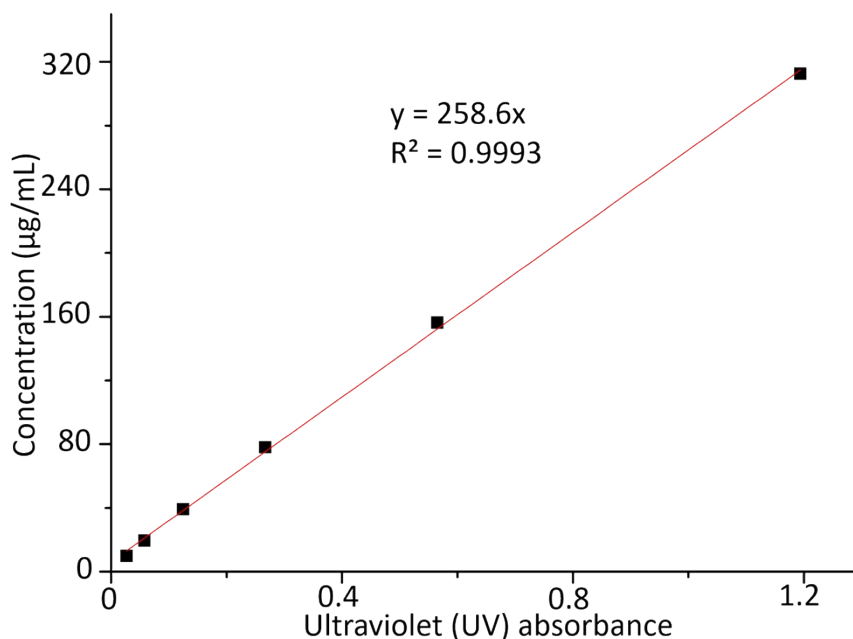

**Figure s1.** The standard curve of the absorbance associated with the concentration of VH at 280 nm.

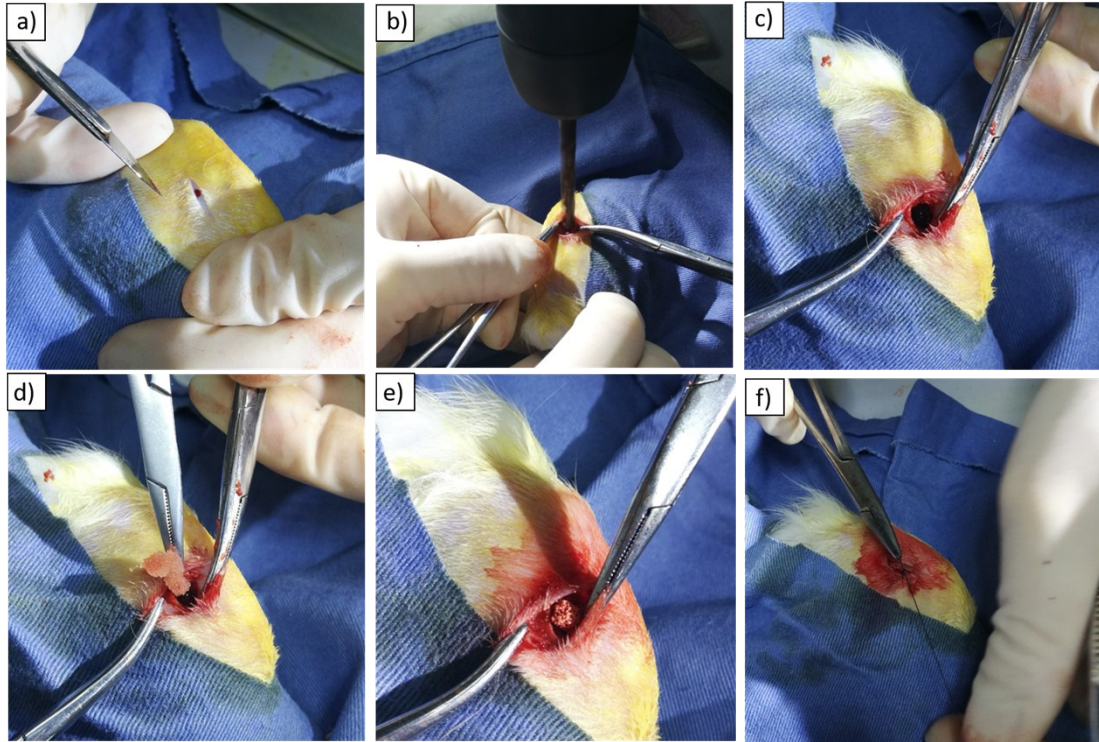

**Figure s2.** The procedure of surgery. a) Incision of skin. b) Drilling of femoral condyle. c) Exposure of surgical site. d) Implanting gelatin sponge containing *S. aureus*. e) Implanting a scaffold. f) Suturing incision.

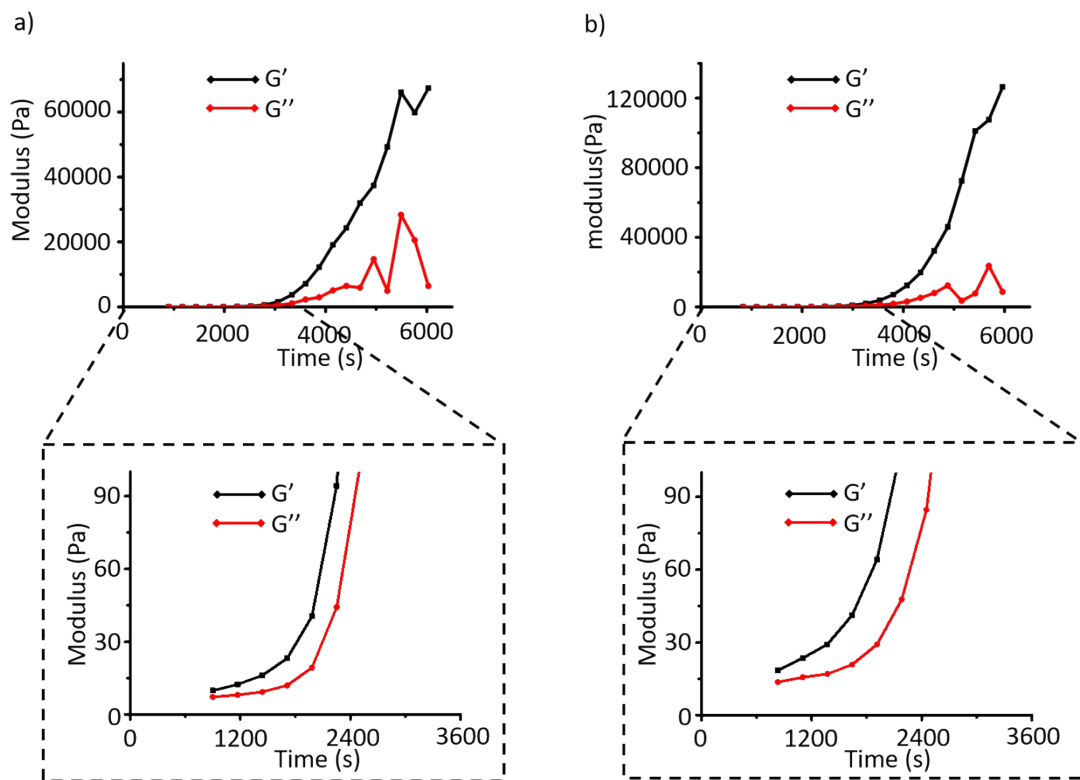

**Figure s3.** Thermosensitive phase transformation property of VH-HA-CS/ $\beta$ -GP. a)

Phase transformation of VH-HA-CS/ $\beta$ -GP containing 0.77% of HA at 37 °C. b) Phase transformation of VH-HA-CS/ $\beta$ -GP containing 1.4% of HA at 37 °C.

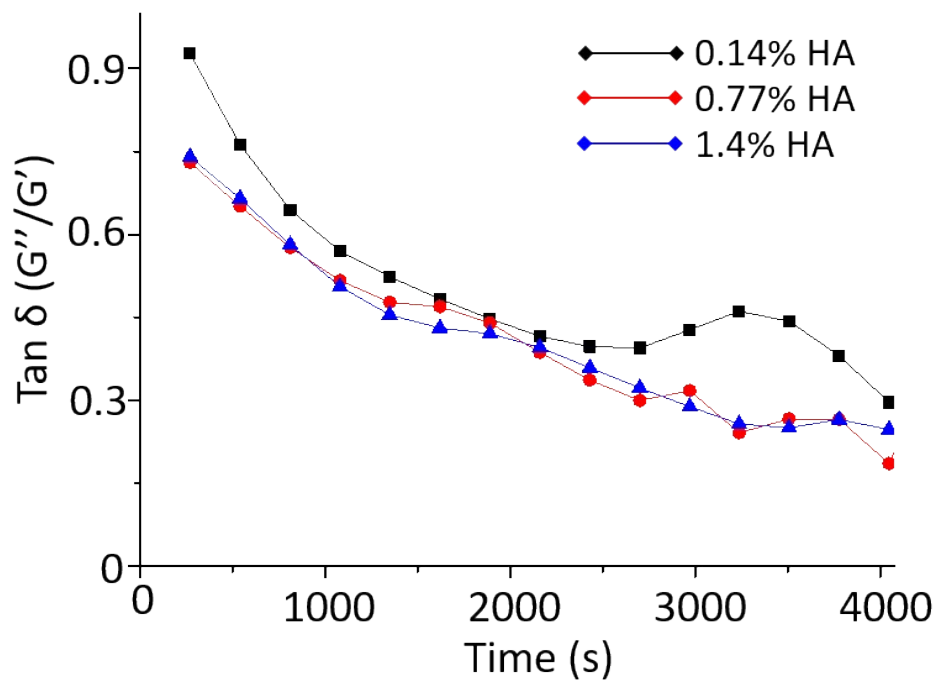

**Figure s4.**  $\tan \delta$  of VH-HA-CS/ $\beta$ -GP at 37 °C. (The frequency of test: 1 Hz)

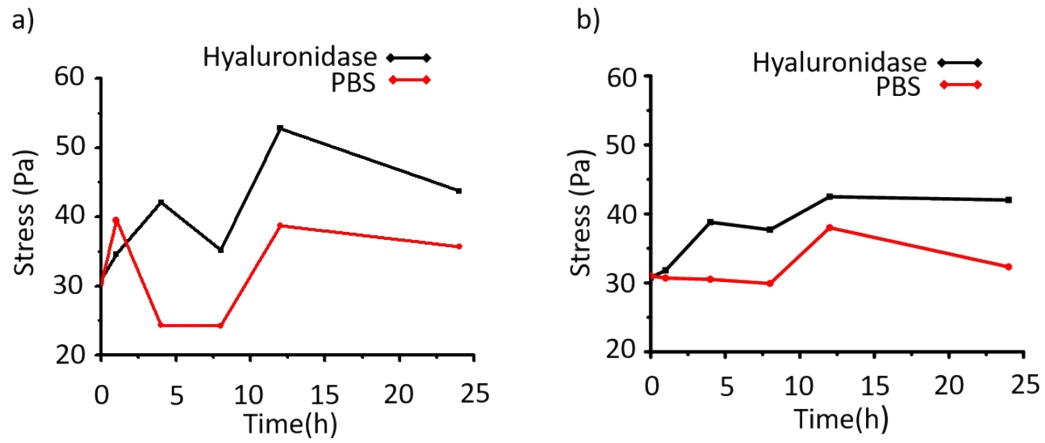

**Figure s5.** The elastic modulus of VH-HA-CS/β-GP gel incubated with hyaluronidase solution (hyaluronidase, m/v 16mg/mL, pH 5) and PBS respectively at 0, 1, 4, 8, 12 and 24 hours at 37 °C. a) Elastic modulus of VH-HA-CS/β-GP gel containing 0.77% of HA. b) Elastic modulus of VH-HA-CS/β-GP gel containing 1.4% of HA.

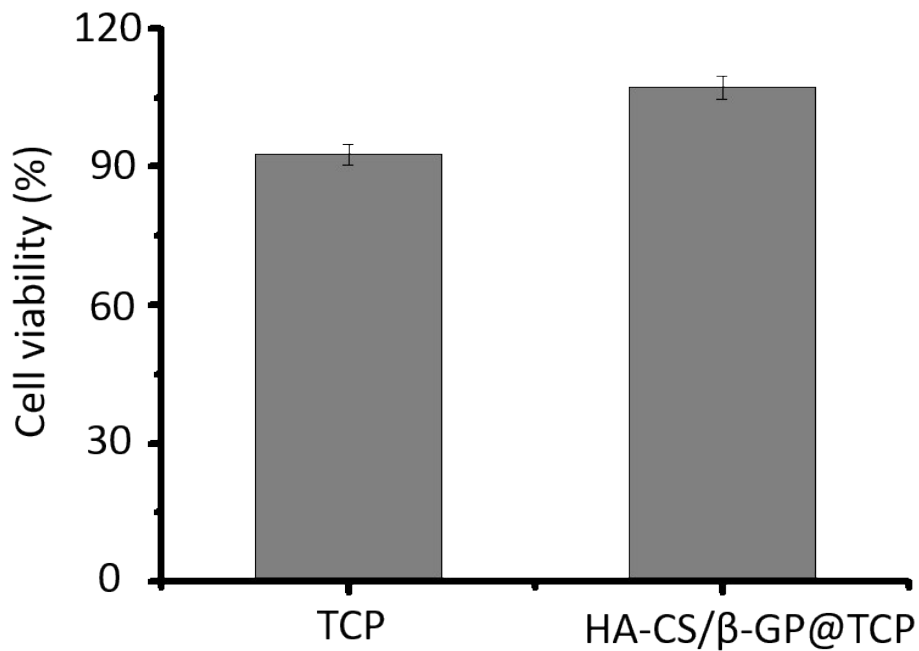

**Figure s6.** Cytotoxicity evaluation of HA-CS/β-GP@TCP and TCP scaffolds.

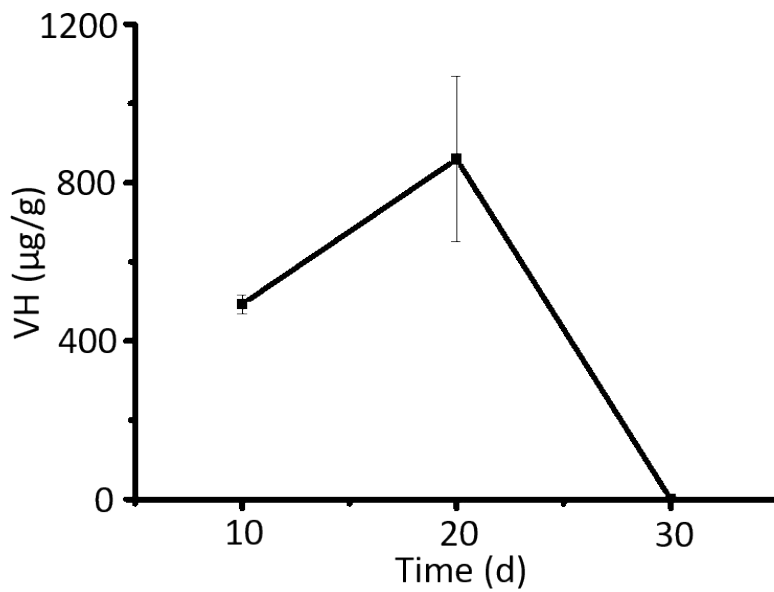

**Figure s7.** Drug release evaluation of VH-HA-CS/β-GP in bone tissue at 10, 20 and 30 days, respectively.

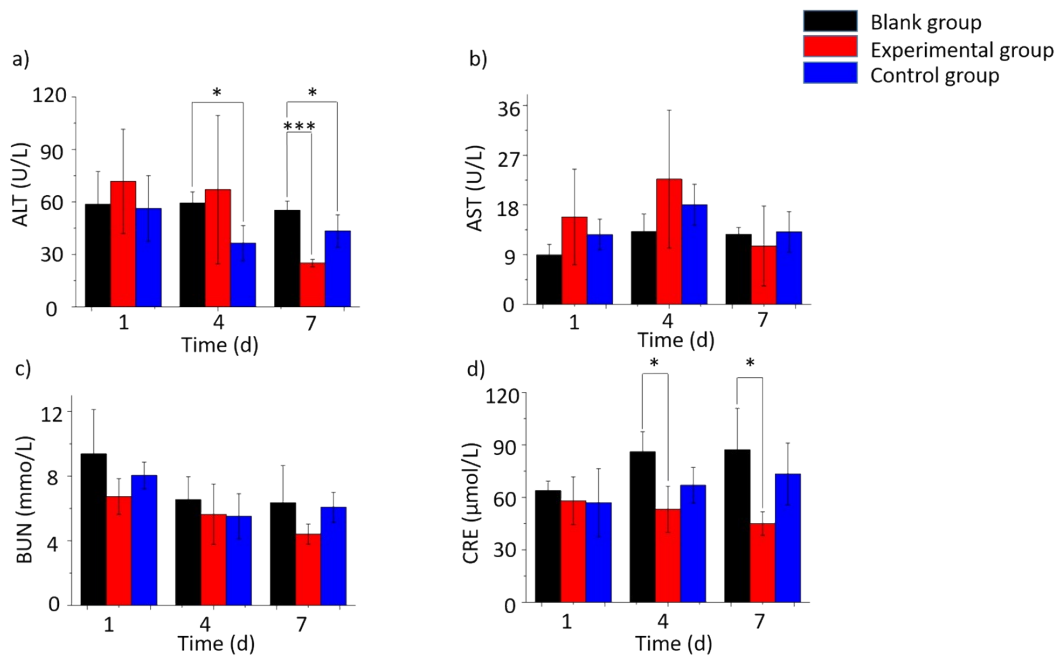

**Figure s8.** Hepatorenal toxicity of VH-HA-CS/β-GP@TCP scaffolds and TCP scaffolds with cefamezin injected intramuscularly for 1 week. a) The test of alanine aminotransferase (ALT) in blood. b) The test of aspartate aminotransferase (AST) in blood. c) The test of blood urea nitrogen (BUN). d) The test of serum creatinine (SCr) in blood.
